# Supplementary material for: CoS/Nanocarbon Composite as a Catalytic Counter Electrode for Improved Performance of Quantum Dot-Sensitized Solar Cells
Source: Hindawi journal article supplement (doi:10.1155/2019/2710712), 2019-07-14
Supplement: f1 [file 2710712.f1.docx]

Supporting Information

**CoS/****nano-****carbon composite as catalytic counter electrode for improved performance of quantum dot-sensitized solar cells**

Wen Yang,a Yang Sun,b Peizhi Yang,*a Xiaobo Chen,*b

a Key Laboratory of Education Ministry for Advance Technique and Preparation of Renewable Energy Materials, Yunnan Normal University, Kunming, 650500, PR China

b School of New Energy and Electronic Engineering, Yancheng Teachers University, Yancheng, 224051, PR China

* Correspondence: pzhyang@hotmail.com (P. Yang); chenxbok@126.com (X. Chen)


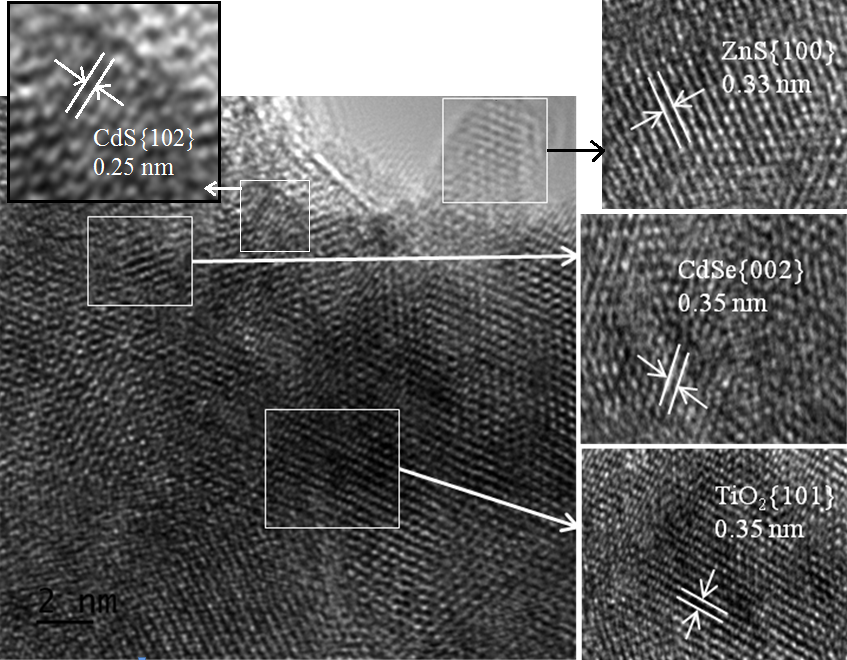


**Fig.** **S1** HR-TEM images of sample TiO2/CdS/CdSe/ZnS.

Fig. S1 was added to provide the evidence that the cell realization procedure allows the realization of CdS/CdSe/ZnS quantum dots. The measured lattice spacings in Fig. S1 are in accordance with the d-spacings of TiO2, CdS, ZnS and CdSe.
